1 **The pyriproxyfen metabolite 4’OH- pyriproxyfen disrupts thyroid hormone signaling and**  
2 **enhances Musashi-1 levels in neuroprogenitors.**

3 Petra Spirhanzlova<sup>1</sup>; Sébastien Le Mével<sup>1</sup>; Karn Wejaphikul<sup>2</sup>; Bilal Mughal<sup>1</sup>; Jean-David  
4 Gothié<sup>1</sup>; Anthony Sébillot<sup>1</sup>; Lucille Butruille; Michelle Leemans<sup>1</sup>, Theo Visser<sup>2</sup>; Sylvie  
5 Remaud<sup>1</sup>; Jean-Baptiste Fini<sup>1</sup> and Barbara Demeneix<sup>1</sup>

6 <sup>1</sup>UMR CNRS 7221, Evolution des Régulations Endocriniennes, Muséum National d’Histoire  
7 Naturelle, Sorbonne Université, 75231 Paris, France.

8 <sup>2</sup>Department of Internal Medicine and Rotterdam Thyroid Center, Erasmus University Medical  
9 Center, Rotterdam, The Netherlands.

10

11 Correspondence and requests for materials should be addressed to B.A.D.

12 (email:bdem@mnhn.fr)

13 Epidemiological and experimental studies have raised questions as to whether the insecticide  
14 pyriproxyfen (PPF) could be implicated in the increased incidence of microcephaly associated  
15 with ZIKA infection during pregnancy. This pesticide is documented as a thyroid hormone (TH)  
16 disrupting chemical. We investigated whether environmentally relevant amounts of its main  
17 metabolite, 4’-OH-pyriproxyfen (4’-OH-PPF), modified TH signaling and early neuronal  
18 development. First, an *in silico* study revealed strong affinity of 4’-OH-PPF to fit the ligand  
19 binding pocket of TH receptors (TRs). Further, *in vitro* assays on human cell lines showed 4’OH-  
20 PPF (> 3 mg/L ) to act as a TR $\alpha$  antagonist. Next, using a transgenic *Xenopus* TH-sensitive  
21 reporter system, Tg(*thibz*:GFP) tadpoles showed that 4’OH-PPF (> 10<sup>-7</sup> mg/L) displayed TH-  
22 disruptive activity and reduced tadpole mobility (> 10<sup>-1</sup> mg/L). Exposure to 4’OH-PPF  
23 significantly reduced *Xenopus* head size at levels equivalent to the maximum recommended daily  
24 intake of PPF (3x 10<sup>-1</sup> mg/L). Most strikingly, in both the *Xenopus* system *in vivo* and in mouse  
25 neurosphere cultures, environmentally relevant concentrations of 4’OH-PPF increased expression  
26 of the gene encoding an RNA-binding protein that enables ZIKA replication: Musashi-1 (*msi1*) in  
27 neurogenic brain areas. We conclude that first, the PPF metabolite, 4’OH-PPF, disrupts thyroid  
28 signaling, neuronal development and behavior in *Xenopus* embryos, and second, that it increases  
29 Musashi-1 levels in neurogenic zones of both mouse and *Xenopus*, creating the potential to  
30 enhance viral replication. As PPF is used in areas with high microcephaly incidence and is  
31 readily broken down to 4’OH-PPF, these findings provide a plausible mechanism whereby PPF  
32 could, through modulating expression of Musashi-1, exacerbate the effects of ZIKA virus  
33 infection.

34 Key words: pyriproxyfen, thyroid hormone, musashi 1, brain development

## 35 **Introduction**

36 A number of lines of evidence link infection by the ZIKA virus to the increased incidence of  
37 microcephaly in Central and South America starting from early 2016 (Alvarado and Schwartz,  
38 2017; de Araújo et al., 2016; Faizan et al., 2016; de Oliveira et al., 2017). However, many authors  
39 have queried as to whether other environmental factors could contribute to the increased  
40 incidence of microcephaly (Butler, 2016a, 2016b; Rodrigues and Paixao, 2017). Certain authors  
41 have queried whether the use of the pesticide pyriproxyfen (PPF) could be implicated (de  
42 Albuquerque et al., 2016; Evans et al., 2016; Parens et al., 2017; REDUAS, 2016). PPF was first  
43 introduced into Brazilian drinking water in late 2014 as a mean of controlling the *Aedes aegypti*  
44 mosquito population, the vector for the ZIKA virus. Highest amounts of PPF were used in the  
45 north-east, but whether or not the pesticide had any toxic effects, related or not to microcephaly  
46 was not thoroughly investigated, neither epidemiologically nor experimentally until recently  
47 (Parens et al., 2017).

48 PPF is a juvenile hormone analog primarily used against household insects including fleas and on  
49 agricultural crops and its use has been approved worldwide (US EPA, 2011; WHO, 2007;  
50 Wilson, 2004). WHO recommends that daily intake of PPF should not exceed 0.3 mg/L for an  
51 average adult and the recommended concentration of PPF in drinking water containers is 0.01  
52 mg/L (WHO, 2007). The use of PPF is not limited only to South America. PPF has been added in  
53 the drinking water in Cambodia or Malaysia and it has been found in Spanish river water and fish  
54 at concentrations reaching 90 ng/L and 0.1-0.3 ng/g respectively (Belenguer et al., 2014; Invest  
55 and Lucas, 2008). However, PPF has been documented as interfering with thyroid hormone (TH)  
56 signaling (Wegner et al., 2016) an essential hormone for brain development (Bernal, 2005).

57 The major pathway of PPF metabolism is hydroxylation at the 4'-position, producing majoritarily  
58 4'-OH-PPF in *Xenopus*, mice, rats, goats, house flies and chicken (Fujimori, 1999; Ose et al.,  
59 2017; Yoshino et al., 1995; Zhang et al., 1998). To our knowledge, no studies have yet assessed  
60 the toxicological potential of 4'-OH- PPF.

61 Given the lack of information on 4'-OH-PPF, we used *Xenopus laevis* tadpoles, a well-known  
62 model for testing TH disruption (Fini et al., 2012, 2017) and mouse neurospheres to investigate  
63 the potential of PPF and 4'-OH-PPF to disrupt thyroid hormone (TH), signaling during brain  
64 development. We also examined how PPF and 4'-OH-PPF affected expression of the key protein,  
65 Musashi-1 known to be required for ZIKA replication (Chavali et al., 2017). *Musashi-1* is down

66 regulated by TH in the neurogenic zone of the adult mouse brain (López-Juárez et al., 2012), one  
67 example of the multiple processes implicating TH during the development of the central and  
68 peripheral nervous system, from stem cell proliferation, lineage decisions, differentiation,  
69 migration, synaptogenesis and myelination (Bernal, 2005; Morreale de Escobar et al., 2004).  
70 Impaired thyroid signaling during development results in brain defects in human (Korevaar et  
71 al., 2016; Pop et al., 1999).

72

## 73 **Materials and methods**

### 74 **1. Materials**

#### 75 *1.1 Reagents*

76 3,3',5-Triiodo-L-thyronine sodium salt (T<sub>3</sub>) (Sigma - CAS 55-06-1), 4'OH pyriproxyfen (HPC –  
77 Ref. 675366), Pyriproxyfen (Sigma – CAS 95737-68-1), Dimethyl sulfoxide –DMSO (Sigma -  
78 CAS 67-68-5), DMEM/F12 (Gibco), Ethyl 3-aminobenzoate methanesulfonate salt (MS 222)  
79 (Sigma - CAS 886-86-2), NH<sub>3</sub> (synthesized by AGV Discovery-France), Sodium bicarbonate  
80 (Sigma- CAS 144-55-8), Paraformaldehyde (Sigma – CAS 30525-89-4), Succrose (Sigma- CAS  
81 57-50-1), Ethylen glycol (Sigma- CAS 107-21-1), Tris, pH 8.0, KCl, MgCl<sub>2</sub>, glycerol, DTT  
82 (Sigma), [<sup>125</sup>I]T<sub>3</sub>, Agilent RNA 6000 Pico Kit, Reverse Transcription Master Mix (Fluidigm),  
83 Power SYBR Master Mix (Life technologies - ref.4368708), RNAqueous –micro kit (Life  
84 technologies - ref. AM1931), Primers (Eurofins), TNT® T7 Quick Coupled  
85 Transcription/Translation System (Promega, Leiden, The Netherlands), nitrocellulose membrane  
86 (Millipore HA filters, 0.45 µm), BSA, Normal goat serum, Papain, Cysteine and DNase, FGF2  
87 (Peprotech), TaqMan Preamp MasterMix, TaqMan Universal PCR MasterMix (both  
88 ThermoFisher), specific TaqMan probes (*Msi1*, Mm00485224\_m1; *ActB*, Mm01205647\_g1;  
89 *Gapdh*, Mm99999915\_g1; *Hprt*, Mm00446968\_m1), Msi1 primary antibody (Rabbit polyclonal  
90 to Msi1- Abcam, UK), Alexa Fluor 488-conjugated anti-rabbit antibody (Thermofisher  
91 Scientific), Milli-Q reference water, Nuclease free water, Evian water in glass bottle 75 cL or  
92 another mineral water with reproducible quality, Liquid nitrogen.

93

94

95 *1.2 Equipment*

96 Electrical devices: BioAnalyzer (Agilent), Daniovision (Noldus), Fluorescent microscope  
97 equipped with 25x objective and long pass GFP filter – Olympus, Incubator, NanoDrop  
98 ThermoScientific, QuantStudio 6 flex QPCR machine (Life technologies), PCR machine  
99 (Biorad), Vortex mixer.

100 Laboratory utensils: 384-well hardshell plate clear, 50 mL Greiner capped tubes (Greiner Bio-one  
101 - ref.227261), 96-well black, conic well plate (Greiner Bio-one - ref. 651209) , Adhesive covers  
102 for 384 well plates, Sterile dissecting tools, Microcentrifuge tubes 0.2 -1.7 mL, flip top, Multi-  
103 distribution pipette , PCR tube Strips 0.2 mL Eppendorf, Micropipettes, Pipette tips 0.2-5000  $\mu$ L,  
104 Transfer pipets with extended fine tip, Transparent flat 6-well plates (TPP, Switzerland),  
105 Transparent flat 12-well plates (TPP, Switzerland).

106 *1.3 Software:*

107 Capture pro (QImaging), ImageJ – optional, GraphPad Prism 7, MS Excel, QuantStudio™ Real-  
108 Time PCR Software, Ethovision XT 11.5, Qiagen CLC Drug discovery 3, NHR scan.

109 **2. Methods**

110 *2.1 In silico*

111 Qiagen CLC Drug discovery 3 was used to assess ligand-protein interactions. Human crystal  
112 structure of thyroid hormone receptor alpha (TR $\alpha$ , 4LNW), bound to a ligand was used. The list  
113 of compounds including pesticides and insecticides used have been outlined in supplementary  
114 table 1 with their corresponding PubChem compound id. Thyroid hormone antagonist NH3 (Lim  
115 et al., 2002) and 4'-OH-PPF were drawn manually. 10,000 iterations were run for each ligand-  
116 protein interaction, against the T<sub>3</sub> binding pocket of TR $\alpha$ , and top 10 recurring interactions were  
117 analysed. The “score” represents the steric fit of ligand in the T<sub>3</sub> binding pocket, where a more  
118 negative score indicates a higher ligand-protein interaction. Mean of top 10 interactions scored  
119 were ranked and displayed in supplementary table 1.

120

121

122

## 123 *2.2 Cell culture, transfection, and luciferase assays*

124 JEG3-cell culture and transfection were performed as previously described (van Gucht et al.,  
125 2016). Briefly, FLAG-tagged human TR $\alpha$ 1 was overexpressed in JEG3 cells together with a  
126 DR4-TRE luciferase reporter construct and pMaxGFP as a transfection control. After 24 hours,  
127 cells were incubated for 24 hours in DMEM/F12+0.1% BSA containing 1 nM of T3 and the  
128 indicated concentrations of 4'-OH-PPF or the TR $\alpha$ 1-antagonist, NH3. Luciferase activity was  
129 measured in cell lysates as previously described (van Mullem et al., 2012). The ratio of the  
130 luciferase and GFP activities was calculated to correct for transfection efficiency. The results are  
131 expressed as percentage of the ratio at 0 nM 4'-OH-PPF or NH3. Data from two independent  
132 experiments performed in triplicate are shown as mean $\pm$ SEM and analysed by One-way ANOVA  
133 with Tukey's post-test. Statistical significance was considered when p-values < 0.05.

## 134 *2.3 [<sup>125</sup>I]T3 competitive binding assays*

135 FLAG-tagged TR $\alpha$ 1 protein was synthesized by the TNT® T7 Quick Coupled  
136 Transcription/Translation System (Promega, Leiden, The Netherlands), according to the  
137 manufacturers' protocol. 0.25  $\mu$ L of TR $\alpha$ 1 protein was incubated for 2 hours at 30°C in binding  
138 buffer (20 mM Tris, pH 8.0, 50 mM KCl, 1 mM MgCl<sub>2</sub>, 10% glycerol, 5 mM DTT) containing  
139 0.02 nM of [<sup>125</sup>I]T<sub>3</sub> and 0-10,000 nM of the unlabelled competitive compound (T<sub>3</sub>, 4'-OH-PPF,  
140 or NH3). Subsequently, samples were filtered through a nitrocellulose membrane (Millipore HA  
141 filters, 0.45  $\mu$ m). The amount of TR-bound [<sup>125</sup>I]T<sub>3</sub> on the membranes was quantified and  
142 expressed as percentage maximal [<sup>125</sup>I]T<sub>3</sub> binding for each competitor. The [<sup>125</sup>I]T<sub>3</sub> dissociation  
143 curve and the dissociation constant (Kd) were computed using GraphPad Prism version 7.0  
144 (GraphPad, La Jolla, CA). The data were shown as mean $\pm$ SEM of at least two independent  
145 experiments performed in duplicate.

## 146 *2.4 Primary mouse NSC neurosphere cultures*

147 C57BL/6 wild-type male mice, eight weeks old, were purchased from Janvier (Le Genest St. Isle,  
148 France). Food and water were available ad libitum. All procedures were conducted according to  
149 the principles and procedures in Guidelines for Care and Use of Laboratory Animals, and  
150 validated by local and national ethical committees. Five mice were sacrificed per neurosphere  
151 culture. Brains were removed and lateral SVZ dissected under a binocular dissection microscope  
152 in DMEM-F12-glutamax 1/50 Glc 45% and incubated with papain, cysteine and DNase for 30

153 min at 37°C with pipette dissociation every 10 min to obtain a single-cell suspension. Cells were  
154 collected by centrifugation (1000 rcf, 5 min). After resuspension, cells were equally distributed in  
155 wells of 96-well plates and cultured in complete culture medium (DMEM-F12 [Gibco], 40  
156 µg/mL insulin [Sigma], 1/200 B-27 supplement [Gibco], 1/100 N-2 supplement [Gibco], 0.3%  
157 glucose, 5 mM Hepes, 100 U/ml penicillin/streptomycin) containing 20 ng/mL of EGF and 20  
158 ng/mL of FGF2 (Peprotech), in a 5% CO<sub>2</sub> environment at 37°C for seven days to obtain primary  
159 neurospheres. To test the effect of T<sub>3</sub> and 4'OH-PPF on neurosphere formation, T<sub>3</sub> (10nM) and/or  
160 4'OH-PPF (10<sup>-2</sup>mg/L, 10<sup>-1</sup> mg/L or 3x10<sup>-1</sup> mg/L) was added to the proliferation medium (12 wells  
161 per condition). Medium was renewed every two days.

162

### 163 2.5 Gene expression analysis – mouse neurospheres

164 After seven days proliferation, neurospheres grown in the same condition were pooled, and RNA  
165 was extracted (ThermoFisher RNAqueous MicroKit) and retro-transcriptions performed  
166 (Fluidigm) following manufacturers' instructions. Preamplifications (10 cycles) and qPCR were  
167 performed using TaqMan Preamp MasterMix and TaqMan Universal PCR MasterMix,  
168 respectively (ThermoFisher), and specific TaqMan probes (References: *Msi1*, Mm00485224\_m1;  
169 *ActB*, Mm01205647\_g1; *Gapdh*, Mm99999915\_g1; *Hprt*, Mm00446968\_m1) following  
170 manufacturer's instructions. Every qPCR amplification was run in triplicate. ΔCt have been  
171 calculated between target genes and the geometrical mean of three endogenous controls, *ActB*,  
172 *Gapdh* and *Hprt*, for each sample. Differences between control and treated groups (ΔΔCt) were  
173 used to calculate fold-increases ( $2^{-\Delta\Delta Ct}$ ) and to determine changes in target genes expression.

174

### 175 2.6 Chemical exposure - *Xenopus laevis* tadpoles

176 The stock solutions of PPF and 4'-OH- PPF were prepared according to following protocol: 15  
177 mg of PPF or 4'-OH- PPF were dissolved in 5 ml of DMSO to create a 3g/L stock solution  
178 (stored at -20°C). Final exposure solution was prepared every day of exposure using fresh  
179 aliquots of stock solutions (prepared by cascade dilutions from 3g/L stock) by adding 1µL of  
180 stock solution to 10 mL of Evian water. All groups including control contained 0.01% DMSO.  
181 Fifteen NF 45 TH/bZip eGFP *Xenopus laevis* tadpoles were placed into each well of 6-well plate.  
182 Each well corresponds to one exposure group. Eight mL of previously prepared final exposure

183 solution was added into the corresponding well. Tadpoles were exposed for 72 hours at 23°C in  
184 dark with daily renewal at the same hour for the XETA assay. For brain gene analysis exposure  
185 was limited to 24 hours. Tadpoles were exposed to both PPF and 4'-OH-PPF in the presence and  
186 the absence of 5nM T<sub>3</sub>, the most biologically active form of TH.

### 187 2.7 XETA - Imaging

188 At the end of the exposure, tadpoles were rinsed in Evian and anaesthetized using MS-222 (100  
189 mg/L; Stock 1g/L- 1g of MS-222 and 1g of sodium bicarbonate dissolved in 1 L of animal water,  
190 pH adjusted to pH 7.4-8; stock diluted 10x in animal water). One anaesthetized Tg(*thibz*:GFP)  
191 tadpole was placed per well into 96-well plate (black, conic based) and positioned using a fine  
192 transfer pipette so the ventral region of the tadpole was facing upwards. To acquire color images  
193 we used Olympus AX-70 binocular equipped with 25x objective, long pass GFP filters and a Q-  
194 Imaging Exi Aqa video camera. Images were captured using the program QC Capture pro  
195 (QImaging) with 3s exposure time. After the image acquisition, tadpoles were euthanized in MS-  
196 222 1g/L, fixed overnight in paraformaldehyde 4% and stored at -20°C in cryoprotectant (150g of  
197 sucrose and 150 mL of ethylen glycol qsp to 500 mL by PBS 1x). Using the program ImageJ  
198 non-specific signal was excluded by splitting the image into 3 layers (red, blue and green  
199 channel) followed by subtraction of the red and blue channel from the green one. Integrated  
200 density of the green channel was then quantified. Statistical analysis was performed in the  
201 program GraphPad Prism 7. Tests used to each experiment are described in the figure legends.

### 202 2.8 RT-qPCR – *Xenopus laevis* tadpole brains

203 At the end of the 24h exposure, tadpoles were rinsed and anaesthetized in 100 mg/L MS-222.  
204 RNA-free dissecting tools were used to dissect tadpole brains. Two brains were placed in one  
205 microdissection tube (nuclease free) containing 100 µL lysis solutions from an RNA extraction  
206 kit (Ambion RNAqueous). Liquid nitrogen was used to snap freeze the tubes which were then  
207 stored at -80°C prior to RNA extraction according to the manufacturer's instructions. The RIN of  
208 each sample was verified using Agilent bionalyzer. Only samples with RIN higher than 7.5 were  
209 used for further RT-qPCR. cDNA was synthesized using Reverse Transcription Master Mix  
210 (Fluidigm). The synthesized cDNA was 20x diluted (5µL of DNA in 95µL of nuclease free  
211 water). qPCR mix contained following components: 0.15 µL of reverse primer (10pM), 0.15 µL  
212 of forward primer (10pM), 1.7 µL of nuclease free water and 3 µL of Power SYBR master mix



213 per reaction. For the final reaction 5  $\mu$ L of previously prepared qPCR mix were added in one well  
214 of 382 well-plate together with 1 $\mu$ L of diluted cDNA. Water control and RT- control was  
215 included on every plate. Comparative  $C_t$  measurements including melt curve were quantified  
216 using QuantStudio 6 flex qPCR device (Life technologies).  $C_t$  value of each sample was exported  
217 in excel format. Geometric mean of two housekeeping genes (*efla* and *odc*) of each sample was  
218 quantified and excluded from the  $C_t$  values corresponding to the sample (resulting in  $\Delta C_t$  value).  
219 Median values of control group of each gene was calculated and extracted from each  $\Delta C_t$  value to  
220 normalize. Fold change using formula  $=(\text{power } 2; - \Delta C_t \text{ value of a sample})$  was calculated and  
221 statistical analysis using resulting values was performed using the program Graphpad Prism7.

222

### 223 2.9 Immunohistochemistry in *Xenopus laevis* tadpole brains

224 After 24h of exposure, tadpoles were euthanized using MS-222 (1g/L) and fixed in 4%  
225 paraformaldehyde for 3h at room temperature. After the fixing period the brains of the tadpoles  
226 were dissected and placed in PBT (1% Triton X-100 in PBS) for at least 18h at 4°C. Next the  
227 brains were blocked in 10% (vol/vol) normal goat serum (NGS) in PBT for 3h at 4°C. The  
228 primary antibody (Rabbit polyclonal to Msi1- Abcam, UK) was diluted 1/300 in 10% NGS in  
229 PBT and the brains were incubated in the solution over night at 4°C. Next morning, the plates  
230 were removed to RT for 1h prior to multiple washes in PBT during a period of at least 8 hours.  
231 Secondary antibody (Alexa Fluor 488-conjugated anti-rabbit (Thermofisher Scientific) diluted  
232 1/400 in 10% NGS in PBT was applied over night at 4°C. After the secondary antibody  
233 treatment, brains were washed several times in PBS during the period of 4 hours. Images of the  
234 dorsal side of the brains were taken using Leica MZ16F stereomicroscope equipped by QImaging  
235 Retiga-SRV camera. Images were analyzed using the program ImageJ. Region of interest was  
236 manually selected and the mean integrated density of each image was calculated with the  
237 threshold set to 60.

### 238 2.10 Mobility of *Xenopus laevis* tadpoles

239 After 72h exposure tadpoles were rinsed in Evian water and placed in 12-well plates with one  
240 tadpole per well each containing 4 mL Evian water. Each group was given 10 minutes  
241 acclimatization time prior to the trial. Tadpole movements were traced for 10 minutes with 30s  
242 light/30s dark intervals using a Daniovision (Noldus) device. Total distance traveled during each



243 10s of the 10min trials were quantified and exported using the Ethiovision XT 1.5 program. All  
244 values were normalized to the mean of the control group of the 0s-10s time period.

245

#### 246 *2.11 Structural measurements of Xenopus laevis tadpole brains*

247 Tadpoles previously fixed in step 2.7 were placed in a Petri dish and manually positioned to  
248 expose the dorsal part of the body. Color images of tadpole heads on black background were  
249 taken using a Leica MZ16F stereomicroscope equipped by QImaging Retiga-SRV camera. Brain  
250 structures were measured in program ImageJ. MS Excel was used to calculate head/brain ratio.

251

#### 252 *2.12 Statistical analysis*

253 Statistical analysis was performed using program Graph Pad Prism 7. The D'Agostino & Pearson  
254 normality test was done to determine if values follow Gaussian distribution (parametric) or not  
255 (non-parametric). One way ANOVA was done in the case of parametric distribution and followed  
256 by Dunnett's multiple comparison post-test. For results displaying non-parametric distribution,  
257 Kruskal-Wallis test with Dunn's multiple comparison post-test was used. If only two groups were  
258 compared, t-test (parametric) or Mann-Whitney's test (non-parametric) was used.

259

260

## 261 3. Results

### 262 3.1. Comparative binding scores predict a strong steric fit into the T<sub>3</sub> binding pocket

263 A comparative ligand-protein interaction of common insecticides, TH and TH analogues  
264 against the human thyroid hormone receptors TR $\alpha$  was carried out and ranked according to their  
265 degree of interaction (Supplementary table 1). T<sub>3</sub>, 4'-OH-PPF and PPF ligands show comparative  
266 binding scores -62.83 and -76.47 (Fig 1A) and -73.3 (Fig S1) respectively for TR $\alpha$ . These scores  
267 predict a strong steric fit of 4'-OH-PPF and PPF, in a similar fashion to T<sub>3</sub>, into the T<sub>3</sub> binding  
268 pocket. With the same method, NH<sub>3</sub> displayed comparative binding scores of -78.7 for TR $\alpha$ .

269

### 270 3.2. High concentrations of 4'-OH-PPF inhibit T<sub>3</sub>-induced transcriptional activity of TR $\alpha$ 1

271 The effect of 4'-OH-PPF on the T<sub>3</sub>-induced transcriptional activity of TR $\alpha$ 1 was  
272 determined by an *in vitro* luciferase reporter assay using human placenta JEG3-cell cultures.  
273 Transcriptional activity was significantly decreased by the highest concentration of 4'-OH-PPF (3  
274 mg/L) (Fig.1B). NH<sub>3</sub> also reduced the transcriptional activity of TR $\alpha$ 1, but already at lower  
275 concentrations (4.7 and 4.7x 10<sup>-1</sup> mg/L) (Fig.1C). These findings shown 4'-OH-PPF can interfere  
276 with T<sub>3</sub>-induced transcriptional activity of TR $\alpha$ 1, but only at a high dose, consistent with the low  
277 affinity binding to the receptor.

### 278 3.3. 4'-OH-PPF binds to TR $\alpha$ 1 with low affinity

279 [<sup>125</sup>I]T<sub>3</sub> competitive binding assays were performed to determine whether 4'-OH-PPF binds to  
280 the TR $\alpha$ 1 receptor. Unlabelled T<sub>3</sub> and NH<sub>3</sub>, were included as positive controls. The K<sub>d</sub> of the  
281 NH<sub>3</sub> was 60-fold higher than the K<sub>d</sub> of unlabelled T<sub>3</sub> (21.6 vs. 0.32 nM), suggesting that NH<sub>3</sub>  
282 can bind to the TR $\alpha$ 1 receptor with a lower affinity than T<sub>3</sub>. Competitive binding of 4'-OH-PPF  
283 to TR $\alpha$ 1 only occurred at the highest concentration (3 mg/L) and the estimated K<sub>d</sub> of 4'-OH-PPF  
284 (~1.2  $\mu$ M) was more than 3000-fold higher than T<sub>3</sub> and 50-fold higher than NH<sub>3</sub> (Fig 1D).

285

286

287

288

289 3.4. *PPF and 4'-OH-PPF affect TH signaling in the XETA assay*

290 Transgenic Tg(*thibz*:GFP) tadpoles were exposed to environmentally-relevant dose ranges of 4'-  
291 OH-PPF or PPF in the presence or absence of T<sub>3</sub> (5nM). The concentrations selected varied from  
292 0.1 ng/L through 100ng/l (concentration of PPF detected in the surface water in Spain (Belenguer  
293 et al., 2014), 0.01mg/L – PPF drinking water limit according to WHO, up to the WHO acceptable  
294 PPF daily intake level ( $3 \times 10^{-1}$  mg/L) (WHO, 2007).

295 PPF, in the absence of T<sub>3</sub>, significantly reduced GFP fluorescence emitted from the tadpole head  
296 region at the following concentrations:  $10^{-5}$ ,  $10^{-4}$ ,  $10^{-2}$  and  $3 \times 10^{-1}$  mg/L (Fig. S2A). In the  
297 presence of T<sub>3</sub>, PPF did not exhibit any thyroid hormone disrupting activity (Fig S2B). In  
298 contrast, 4'-OH- PPF was not active without T<sub>3</sub> (Fig 2B), but in its presence, all concentrations of  
299 4'-OH- PPF significantly reduced the GFP signal (Fig 2C). These results suggest that both PPF  
300 and its metabolite 4'-OH- PPF exhibit TH- disrupting properties, but that the parent compound is  
301 active in the absence of T<sub>3</sub> whereas the metabolite antagonizes the effects of T<sub>3</sub>.

302 3.5. *PPF and 4'-OH-PPF affect tadpole mobility*

303 Tadpoles exposed to PPF for 72 h reacted to the light stimulus but moved significantly less than  
304 controls (Fig S2C-H). Significant differences were observed in tadpoles exposed to all  
305 concentrations of PPF with the exception of  $10^{-3}$  mg/L. In the case of 4'-OH-PPF, the tadpoles  
306 exhibited reduced mobility compared to controls, reaching significance at the two highest  
307 concentrations ( $10^{-1}$  and  $3 \times 10^{-1}$  mg/L)(Fig 2D,E).

308 3.6. *PPF and 4'-OH-PPF affect brain morphology*

309 The total head and brain area was measured using the ImageJ program. Head /brain ratio was  
310 calculated using MS Excel. PPF did not affect brain or head size, nor was the head/brain size  
311 ratio significantly different compared to controls (Fig S4C-E). However, tadpoles exposed to  
312  $3 \times 10^{-1}$  mg/L of 4'-OH-PPF exhibited significantly smaller heads compared to control (Fig 2F),  
313 thus resulting in biased brain/head ratios (Fig 2H), however the brain size of these tadpoles was  
314 not affected (Fig 2G). The width and length of brain compartments were measured (Fig S4B).  
315 The width of forebrain (H1) was increased in tadpoles exposed to PPF at concentrations  $10^{-4}$   
316 mg/L –  $10^{-1}$  mg/L (Fig S4F). The width of midbrain (H3) was significantly increased in tadpoles  
317 exposed to concentrations of PPF  $10^{-3}$  mg/L and higher (Fig S4H). The length of the whole brain

318 (L3) was significantly increased by exposure to PPF at concentration  $10^{-3}$  mg/L and higher (Fig  
319 Fig S4H). In the case of 4'-OH- PPF, the lowest concentration  $10^{-5}$  mg/L significantly increased  
320 the width of forebrain and midbrain junction (Fig S4M) and the width of midbrain (Fig S4N).

### 321 3.7. PPF and 4'-OH- PPF affect brain *musashi-1* gene and protein expression in *Xenopus* 322 *laevis* tadpoles

323 We studied the consequences of a 24h exposure with PPF or 4'-OH PPF on brain gene *musashi-1*  
324 (*msil*) expression and its encoded protein in *Xenopus in vivo*. *Msil* brain gene and protein  
325 expression was analyzed following 24h exposure to each compound as a function of results seen  
326 in the XETA test. Thus, PPF was run without  $T_3$  whereas 4'-OH-PPF was tested in the presence  
327 5nM  $T_3$ .  $T_3$  5nM significantly reduced the expression of *msil* gene and its encoded protein (Fig 3  
328 A-C). 4'-OH-PPF increased the expression of *msil* gene at both concentrations tested in the  
329 presence of  $T_3$  5nM (Fig 3B) and increased *msil* protein expression at  $10^{-2}$  mg/L (Fig 3C). PPF  
330 did not affect *msil* gene expression (Fig S3A) however the highest concentration  $3 \times 10^{-1}$  mg/L  
331 significantly reduced the expression of *msil* protein in the brain of NF45 tadpoles after 24 hours  
332 (Fig S3B).

### 333 3.8. 4'-OH- PPF increases *Msil* gene expression in mouse neurospheres

334 *Msil* gene expression in mouse neurospheres after 7 d proliferation in the presence of 4'-OH-PPF  
335 was analyzed by RT-qPCR. The expression of *Msil* gene was increased 3-fold by  $T_3$  10 nM and  
336 the highest concentration of 4'-OH-PPF  $3 \times 10^{-1}$  mg/L in the presence and absence of  $T_3$  10 nM  
337 (fold induction 10 and 14 respectively) (Fig 3D).

338

#### 339 4. Discussion

340 Given paucity and the contradictory nature of studies on the potentially adverse effects of PPF,  
341 we investigated whether its main metabolite, 4'-OH-PPF, affects TH signaling and *Msi1* gene  
342 expression using *in silico*, *in vitro* and *in vivo* approaches. TH modulates every stage of brain  
343 development, thus any modification of TH availability and action could have direct consequences  
344 on neurogenesis and brain morphology, as well as on cranio-facial development (Bernal, 2005).  
345 The importance of TH for brain development, and notably for regulating *Musashi 1* gene  
346 expression in neuroprogenitor cells (López-Juárez et al., 2012), raised the question as to whether  
347 TH disruption caused by PPF exposure might be implicated in the severity of the incidence of  
348 microcephaly in certain regions of Brazil, especially North Eastern Brazil (area with the highest  
349 incidence of microcephaly), where it has been used intensively (Parens et al., 2017).

350 The *in silico* results revealed that 4'-OH- PPF had a high steric fit for both TR $\alpha$  we tested  
351 whether the metabolite blocked T<sub>3</sub> binding to the TR LBDs. The *in vitro* study showed that 4'-  
352 OH-PPF acts as TR $\alpha$  antagonist at a concentration 3 mg/L, approximately 10x the WHO  
353 recommended daily intake of PPF (WHO, 2007) (Fig. 1B,D). These findings indicate that  
354 although TR $\alpha$ 1 can bind 4'-OH-PPF, the affinity is much lower than for T<sub>3</sub> and NH<sub>3</sub>, which is  
355 not in accordance with predicted strong steric fit of 4'-OH-PPF into the T<sub>3</sub> binding pocket as  
356 shown by *in silico* docking.

357 However, our findings that 4'-OH-PPF affects expression *msi1* gene and protein offer a plausible  
358 mechanism to explain potential increase of susceptibility to ZIKV. We show that 4'-OH-PPF  
359 increased the levels of *msi1* gene and its encoded protein in the brain area of early stage tadpoles  
360 in the presence of T<sub>3</sub> 5nM and increased the expression of *Msi1* gene in adult mouse  
361 neurospheres in the presence and absence of T<sub>3</sub> 5nM. *Msi1* RNA has been shown to interact with  
362 the ZIKA RNA by mediation of the 3'UTR of the ZIKA virus and is required for ZIKA  
363 replication (Chavali et al., 2017). *Msi1* is an important translational regulator in neuronal stem  
364 cells in both vertebrates and invertebrates which is enriched in neural progenitors at the  
365 ventricular and sub ventricular zones but absent from the cortical plate (Chavali et al., 2017). We  
366 had previously shown that this gene is downregulated *in vivo* in mice subventricular zone by  
367 T<sub>3</sub>/TR $\alpha$  during progenitor to neuroblast commitment (López-Juárez et al., 2012). We analyzed  
368 the regulatory element upstream of human *MSII* gene by NHR scan, finding that this sequence  
369 contains a number of DR4 type response elements, i.e. potential TR binding sites (Chang and

370 Pan, 1998; Paquette et al., 2014; Quack et al., 2002). A recent study compared neuroprogenitor  
371 cells (NPCs) from twins discordant for Congenital Zika Syndrome (CZS) displayed differences in  
372 NPC gene expression that could underly increased susceptibility to ZIKV-induced microcephaly  
373 through viral replication (Caires-Júnior et al., 2018).

374 Arguments against the implication of PPF in microcephaly have been put forward by the  
375 manufacturer, Sumitomo. In their most relevant study, Sumitomo exposed pregnant rat dams  
376 during the days 7 to 17 of gestation to dose range of PPF. The pups were then observed for  
377 physical deformations and their organs weighed. According to the producer, results did not  
378 indicate any significant changes on the nervous or reproductive systems (Saegusa, 1988).  
379 However a recent review (Parens et al., 2017) suggests that the assay may not be sufficiently  
380 sensitive and was largely restricted to analyzing impact on adult animals. Parens et al, also  
381 noticed that the report describes low brain mass and one case of microcephaly. This case was  
382 considered irrelevant by Sumitomo who argued that microcephaly should not be considered due  
383 to its dose-dependence. Parens et al., also proposed a possible mechanism of action for PPF-  
384 driven microcephaly implicating cross reactivity of PPF with retinoic acid (RA) signaling.  
385 Juvenile hormones and retinoic acid share structural similarity and it is known, that some juvenile  
386 hormones are able to bind to the retinoid acid receptor (RAR) (Harmon et al., 1995; Palli et al.,  
387 1991). They propose that PPF, a juvenile hormone analog, binds to RAR and mimics the effect  
388 of RA, which itself has been previously connected with the induction of microcephaly (Soprano  
389 and Soprano, 1995). TH and RA interact during neurogenesis (Gil-Ibáñez et al., 2014), with RA  
390 and TR binding to nuclear receptors of steroid/thyroid hormone receptor superfamily, sharing  
391 certain gene response elements (Glass et al., 1989) and their heterodimeric retinoid X receptor  
392 (RXR) partner on DNA (Kliewer et al., 1992; Zhang and Kahl, 1993). It has been also  
393 demonstrated that RA and TH interact to regulate craniofacial development with RXR partially  
394 mediating their interaction (Bohnsack and Kahana, 2013).

395 Only two studies, both using Zebrafish, have addressed the question of whether PPF could be  
396 implicated in microcephaly, each producing contradictory results (Dzieciolowska et al., 2017;  
397 Truong et al., 2016). One study (Truong et al., 2016) demonstrated that PPF induces adverse  
398 morphological changes including craniofacial defects in zebrafish at 5.2  $\mu\text{M}$  (1.66 mg/L) - EC50.  
399 In the behavioral test PPF at 6.4 $\mu\text{M}$  (2 mg/L) and 64 $\mu\text{M}$  (20mg/L) significantly reduced the



400 mobility of the zebrafish larvae compared to control animals. The authors concluded that the  
401 developmental toxicity of PPF may not be limited only to insects (Truong et al., 2016).

## 402 **Conclusions**

403 Taken together our results and previous findings we provide a range of evidence, that PPF and its  
404 metabolite 4'-OH- PPF affect TH signaling, brain gene expression and behavior. We propose a  
405 plausible mechanism of action, ie that changes in *musashi1* expression could exacerbate ZIKA  
406 virus infection.

## 407 **Acknowledgements**

408 We are grateful for the work in the *Xenopus* facility of Gérard Benisti, Philippe Durand and Jean-  
409 Paul Chaumeil. We would like to thank all our colleagues for their comments on the manuscript,  
410 and Fiene Kuijper for analysis of the mouse neurosphere data. This work was supported by grants  
411 from Centre National de la Recherche Scientifique (CNRS), Muséum National d'Histoire  
412 Naturelle (MNHN), PNREST THYPEST EST-2014-122 and European Union contract EDC MIX  
413 RISK\_GA N°634880.

## 414 415 **Author Contributions**

416 P.S., J.B.F and B.D. designed the study. P.S. carried out the *in vivo* experiments and analyzed the  
417 data. S.L. helped with the immunohistochemistry. K.W. and T.V. carried out the *in vitro*  
418 experiments. B.M. carried out the *in silico* study. M.L. helped with the fluorescence read-out,  
419 immunohistochemistry, brain dissections and prepared *Xenopus* breedings. P.S, J.B.F., and B.D.  
420 wrote the paper. All authors discussed the results and commented on the manuscript.

421

## 422 **References**

- 423 de Albuquerque, M. de F.P.M., de Souza, W.V., Mendes, A. da C.G., Lyra, T.M., Ximenes, R.A.,  
424 Araújo, T.V., Braga, C., Miranda-Filho, D.B., Martelli, C.M., and Rodrigues, L.C. (2016).  
425 Pyriproxyfen and the microcephaly epidemic in Brazil - an ecological approach to explore the  
426 hypothesis of their association. *Mem. Inst. Oswaldo Cruz* *111*, 774–776.
- 427 Alvarado, M.G., and Schwartz, D.A. (2017). Zika Virus Infection in Pregnancy, Microcephaly,  
428 and Maternal and Fetal Health: What We Think, What We Know, and What We Think We  
429 Know. *Arch. Pathol. Lab. Med.* *141*, 26–32.
- 430 de Araújo, T.V.B., Rodrigues, L.C., de Alencar Ximenes, R.A., de Barros Miranda-Filho, D.,  
431 Montarroyos, U.R., de Melo, A.P.L., Valongueiro, S., de Albuquerque, M. de F.P.M., Souza,  
432 W.V., Braga, C., et al. (2016). Association between Zika virus infection and microcephaly in  
433 Brazil, January to May, 2016: preliminary report of a case-control study. *Lancet Infect. Dis.* *16*,  
434 1356–1363.
- 435 Belenguer, V., Martinez-Capel, F., Masiá, A., and Picó, Y. (2014). Patterns of presence and  
436 concentration of pesticides in fish and waters of the Júcar River (Eastern Spain). *J. Hazard.*  
437 *Mater.* *265*, 271–279.
- 438 Bernal, J. (2005). Thyroid Hormones and Brain Development. In *Vitamins & Hormones*,  
439 (Academic Press), pp. 95–122.
- 440 Bohnsack, B.L., and Kahana, A. (2013). Thyroid Hormone and Retinoic Acid Interact to  
441 Regulate Zebrafish Craniofacial Neural Crest Development. *Dev. Biol.* *373*, 300–309.
- 442 Butler, D. (2016a). Brazil asks whether Zika acts alone to cause birth defects. *Nature* *535*, 475–  
443 476.
- 444 Butler, D. (2016b). Zika virus: Brazil’s surge in small-headed babies questioned by report. *Nature*  
445 *530*, 13–14.
- 446 Caires-Júnior, L.C., Goulart, E., Melo, U.S., Araujo, B.H.S., Alvizi, L., Soares-Schanoski, A.,  
447 Oliveira, D.F., Kobayashi, G.S., Griesi-Oliveira, K., Musso, C.M., et al. (2018). Discordant  
448 congenital Zika syndrome twins show differential in vitro viral susceptibility of neural progenitor  
449 cells. *Nat. Commun.* *9*, 475.
- 450 Chang, C., and Pan, H.J. (1998). Thyroid hormone direct repeat 4 response element is a positive  
451 regulatory element for the human TR2 orphan receptor, a member of steroid receptor  
452 superfamily. *Mol. Cell. Biochem.* *189*, 195–200.
- 453 Chavali, P.L., Stojic, L., Meredith, L.W., Joseph, N., Nahorski, M.S., Sanford, T.J., Sweeney,  
454 T.R., Krishna, B.A., Hosmillo, M., Firth, A.E., et al. (2017). Neurodevelopmental protein  
455 Musashi-1 interacts with the Zika genome and promotes viral replication. *Science* *357*, 83–88.
- 456 Dzieciolowska, S., Larroque, A.-L., Kranjec, E.-A., Drapeau, P., and Samarut, E. (2017). The  
457 larvicide pyriproxyfen blamed during the Zika virus outbreak does not cause microcephaly in  
458 zebrafish embryos. *Sci. Rep.* *7*, 40067.

- 459 Evans, D., Nijhout, F., Parens, R., Morales, A.J., and Bar-Yam, Y. (2016). A Possible Link  
460 Between Pyriproxyfen and Microcephaly. *BioRxiv* 048538.
- 461 Faizan, M.I., Abdullah, M., Ali, S., Naqvi, I.H., Ahmed, A., and Parveen, S. (2016). Zika Virus-  
462 Induced Microcephaly and Its Possible Molecular Mechanism. *Intervirology* 59, 152–158.
- 463 Fini, J.B., Le Mével, S., Palmier, K., Darras, V.M., Punzon, I., Richardson, S.J., Clerget-  
464 Froidevaux, M.S., and Demeneix, B.A. (2012). Thyroid hormone signaling in the *Xenopus laevis*  
465 embryo is functional and susceptible to endocrine disruption. *Endocrinology* 153, 5068–5081.
- 466 Fini, J.-B., Mughal, B.B., Mével, S.L., Leemans, M., Lettmann, M., Spirhanzlova, P., Affaticati,  
467 P., Jenett, A., and Demeneix, B.A. (2017). Human amniotic fluid contaminants alter thyroid  
468 hormone signalling and early brain development in *Xenopus* embryos. *Sci. Rep.* 7, 43786.
- 469 Fujimori (1999). *Toxicological evaluations* (Rome).
- 470 Gil-Ibáñez, P., Bernal, J., and Morte, B. (2014). Thyroid Hormone Regulation of Gene  
471 Expression in Primary Cerebrocortical Cells: Role of Thyroid Hormone Receptor Subtypes and  
472 Interactions with Retinoic Acid and Glucocorticoids. *PLOS ONE* 9, e91692.
- 473 Glass, C.K., Lipkin, S.M., Devary, O.V., and Rosenfeld, M.G. (1989). Positive and negative  
474 regulation of gene transcription by a retinoic acid-thyroid hormone receptor heterodimer. *Cell* 59,  
475 697–708.
- 476 van Gucht, A.L.M., Meima, M.E., Zwaveling-Soonawala, N., Visser, W.E., Fliers, E., Wennink,  
477 J.M.B., Henny, C., Visser, T.J., Peeters, R.P., and van Trotsenburg, A.S.P. (2016). Resistance to  
478 Thyroid Hormone Alpha in an 18-Month-Old Girl: Clinical, Therapeutic, and Molecular  
479 Characteristics. *Thyroid Off. J. Am. Thyroid Assoc.* 26, 338–346.
- 480 Harmon, M.A., Boehm, M.F., Heyman, R.A., and Mangelsdorf, D.J. (1995). Activation of  
481 mammalian retinoid X receptors by the insect growth regulator methoprene. *Proc. Natl. Acad.*  
482 *Sci. U. S. A.* 92, 6157–6160.
- 483 Invest, J.F., and Lucas, J.R. (2008). Pyriproxyfen as mosquito larvicide.
- 484 Kliewer, S.A., Umesono, K., Mangelsdorf, D.J., and Evans, R.M. (1992). Retinoid X receptor  
485 interacts with nuclear receptors in retinoic acid, thyroid hormone and vitamin D3 signalling.  
486 *Nature* 355, 446–449.
- 487 Korevaar, T.I.M., Muetzel, R., Medici, M., Chaker, L., Jaddoe, V.W.V., Rijke, Y.B. de, Steegers,  
488 E.A.P., Visser, T.J., White, T., Tiemeier, H., et al. (2016). Association of maternal thyroid  
489 function during early pregnancy with offspring IQ and brain morphology in childhood: a  
490 population-based prospective cohort study. *Lancet Diabetes Endocrinol.* 4, 35–43.
- 491 Lim, W., Nguyen, N.-H., Yang, H.Y., Scanlan, T.S., and Furlow, J.D. (2002). A thyroid hormone  
492 antagonist that inhibits thyroid hormone action in vivo. *J. Biol. Chem.* 277, 35664–35670.
- 493 López-Juárez, A., Remaud, S., Hassani, Z., Jolivet, P., Pierre Simons, J., Sontag, T., Yoshikawa,  
494 K., Price, J., Morvan-Dubois, G., and Demeneix, B.A. (2012). Thyroid hormone signaling acts as

- 495 a neurogenic switch by repressing Sox2 in the adult neural stem cell niche. *Cell Stem Cell* *10*,  
496 531–543.
- 497 Morreale de Escobar, G., Obregon, M.J., and Escobar del Rey, F. (2004). Role of thyroid  
498 hormone during early brain development. *Eur. J. Endocrinol.* *151 Suppl 3*, U25-37.
- 499 van Mullem, A., van Heerebeek, R., Chrysis, D., Visser, E., Medici, M., Andrikoula, M.,  
500 Tsatsoulis, A., Peeters, R., and Visser, T.J. (2012). Clinical phenotype and mutant TR $\alpha$ 1. *N.*  
501 *Engl. J. Med.* *366*, 1451–1453.
- 502 de Oliveira, W.K., de França, G.V.A., Carmo, E.H., Duncan, B.B., de Souza Kuchenbecker, R.,  
503 and Schmidt, M.I. (2017). Infection-related microcephaly after the 2015 and 2016 Zika virus  
504 outbreaks in Brazil: a surveillance-based analysis. *Lancet Lond. Engl.* *390*, 861–870.
- 505 Ose, K., Miyamoto, M., Fujisawa, T., and Katagi, T. (2017). Bioconcentration and Metabolism of  
506 Pyriproxyfen in Tadpoles of African Clawed Frogs, *Xenopus laevis*. *J. Agric. Food Chem.* *65*,  
507 9980–9986.
- 508 Palli, S.R., Riddiford, L.M., and Hiruma, K. (1991). Juvenile hormone and “retinoic acid”  
509 receptors in *Manduca* epidermis. *Insect Biochem.* *21*, 7–15.
- 510 Paquette, M.A., Atlas, E., Wade, M.G., and Yauk, C.L. (2014). Thyroid hormone response  
511 element half-site organization and its effect on thyroid hormone mediated transcription. *PloS One*  
512 *9*, e101155.
- 513 Parens, R., Nijhout, H.F., Morales, A., Costa, F.X., and Bar-Yam, Y. (2017). A Possible Link  
514 Between Pyriproxyfen and Microcephaly. *PLOS Curr. Outbreaks*.
- 515 Pop, V.J., Kuijpers, J.L., van Baar, A.L., Verkerk, G., van Son, M.M., de Vijlder, J.J., Vulsma,  
516 T., Wiersinga, W.M., Drexhage, H.A., and Vader, H.L. (1999). Low maternal free thyroxine  
517 concentrations during early pregnancy are associated with impaired psychomotor development in  
518 infancy. *Clin. Endocrinol. (Oxf.)* *50*, 149–155.
- 519 Quack, M., Frank, C., and Carlberg, C. (2002). Differential nuclear receptor signalling from  
520 DR4-type response elements. *J. Cell. Biochem.* *86*, 601–612.
- 521 REDUAS (2016). REPORT from Physicians in the Crop-Sprayed Town regarding Dengue-Zika,  
522 microcephaly, and massive spraying with chemical poisons.
- 523 Rodrigues, L.C., and Paixao, E.S. (2017). Risk of Zika-related microcephaly: stable or variable?  
524 *Lancet Lond. Engl.* *390*, 824–826.
- 525 Saegusa, T. (1988). Study of S-31183 by oral administration during the period of fetal  
526 organogenesis in rats (Osaka, Japan: Sumitomo Chemical Co.).
- 527 Soprano, D.R., and Soprano, K.J. (1995). Retinoids as teratogens. *Annu. Rev. Nutr.* *15*, 111–132.
- 528 Truong, L., Gonnerman, G., Simonich, M.T., and Tanguay, R.L. (2016). Assessment of the  
529 developmental and neurotoxicity of the mosquito control larvicide, pyriproxyfen, using  
530 embryonic zebrafish. *Environ. Pollut. Barking Essex 1987* *218*, 1089–1093.

- 531 US EPA (2011). Pyriproxyfen.
- 532 Wegner, S., Browne, P., and Dix, D. (2016). Identifying reference chemicals for thyroid  
533 bioactivity screening. *Reprod. Toxicol. Elmsford N* 65, 402–413.
- 534 WHO (2007). Pyriproxyfen in drinking-water: Background document for development  
535 of WHO guidelines for drinking-water quality. World Health Organ.  
536 WHOSDEWSH070110.
- 537 Wilson, T.G. (2004). The molecular site of action of juvenile hormone and juvenile hormone  
538 insecticides during metamorphosis: how these compounds kill insects. *J. Insect Physiol.* 50, 111–  
539 121.
- 540 Yoshino, H., Kaneko, H., Nakatsuka, I., and Yamada, H. (1995). Metabolism of Pyriproxyfen. 2.  
541 Comparison of in Vivo Metabolism between Rats and Mice. *J. Agric. Food Chem.* 43, 2681–  
542 2686.
- 543 Zhang, X.K., and Kahl, M. (1993). Regulation of retinoid and thyroid hormone action through  
544 homodimeric and heterodimeric receptors. *Trends Endocrinol. Metab. TEM* 4, 156–162.
- 545 Zhang, L., Harada, K., and Shono, T. (1998). Cross resistance to insect growth regulators in  
546 pyriproxyfen-resistant housefly. *Appl. Entomol. Zool.* 33, 195–197.
- 547
- 548

549 **Graphical abstract**

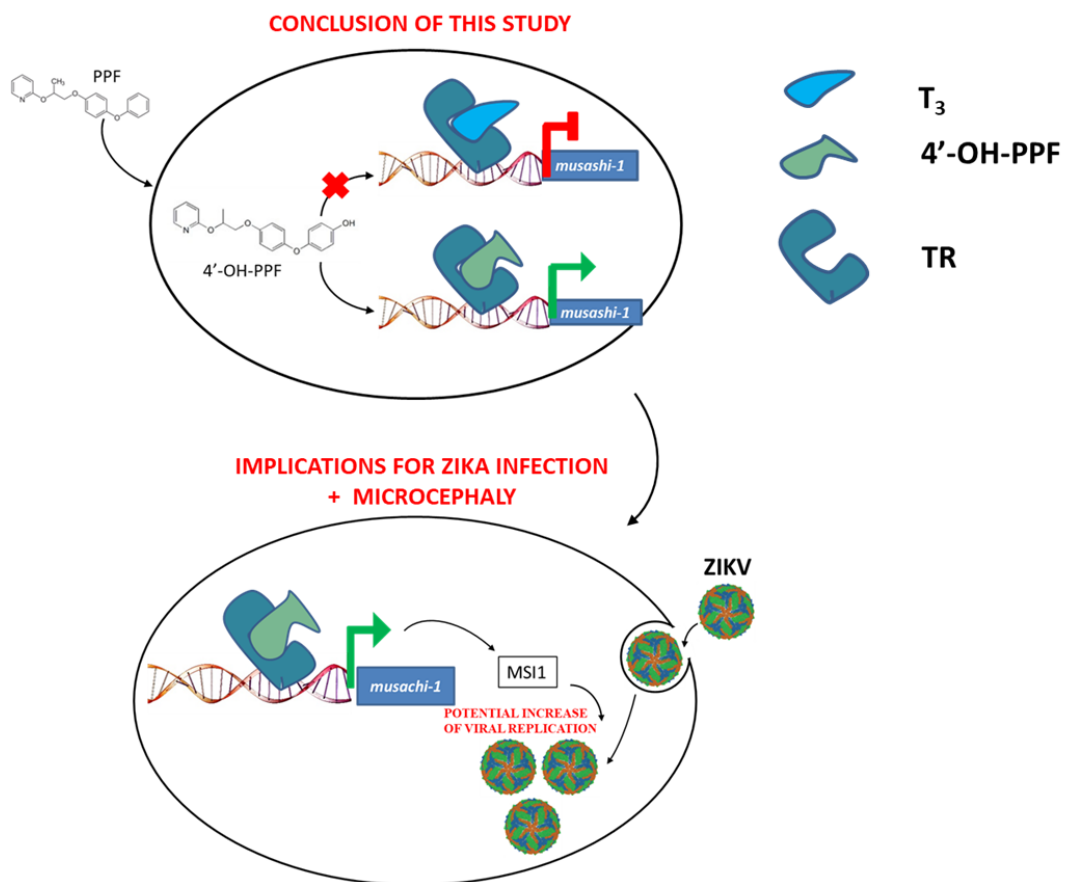

550

551



552 **Figures**

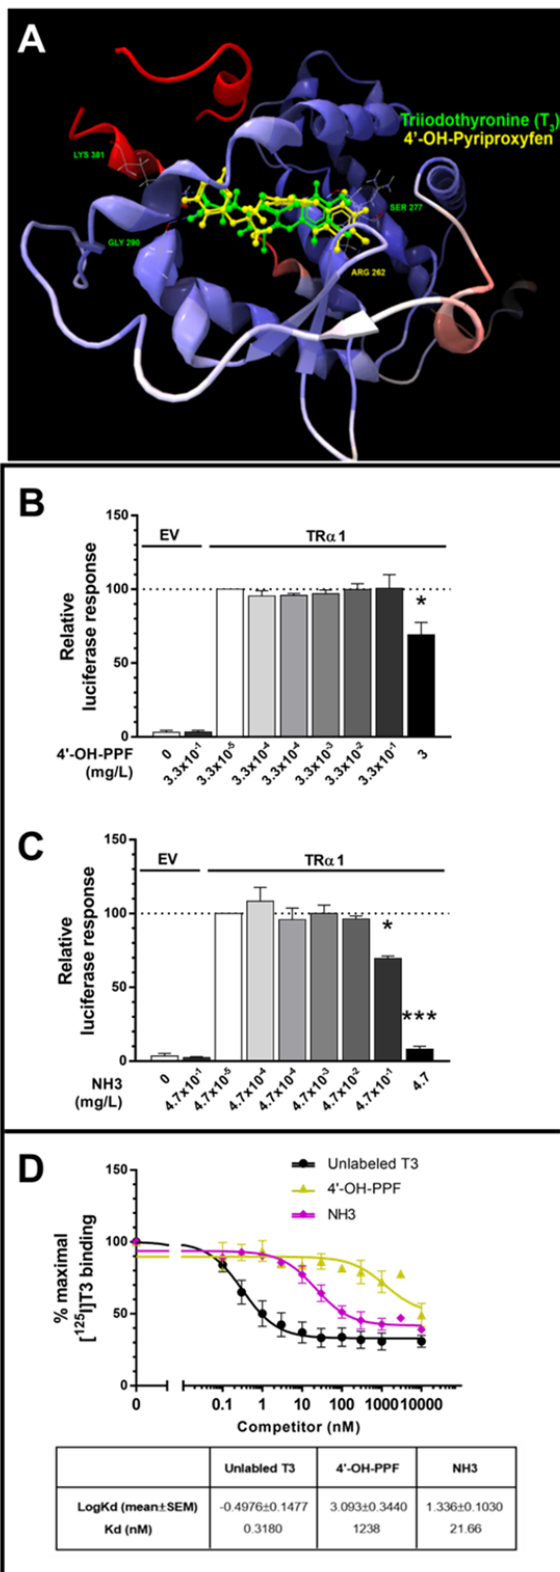

553

554

555 **Figure 1. 4'-OH-PPF acts as Thra antagonist with affinity 50x lower than NH3.** (A) Docking  
556 result of Triiodothyronine (T<sub>3</sub>) and 4'-OH-Pyriproxifen on the crystal structure of human thyroid  
557 hormone receptor alpha (TR $\alpha$ , 4LNW). <10,000 iterations were run for each ligand within the T<sub>3</sub>  
558 binding pocket, with top 10 docking results analysed for varying conformations using CLC Drug  
559 Discovery 3. Ligand docking of triiodothyronine (T<sub>3</sub>) with three hydrogen bonds are; LYS<sup>381</sup>,  
560 GLY<sup>290</sup> and SER<sup>277</sup> for TR $\alpha$ . Ligand docking of 4'-OH-Pyriproxifen with one hydrogen bond is  
561 ARG<sup>262</sup> for TR $\alpha$ . T<sub>3</sub> and 4'-OH-Pyriproxifen ligands show comparative binding scores -65.25  
562 and -77.33 respectively for TR $\alpha$ . These scores predict a strong steric fit of 4'-OH-Pyriproxifen  
563 into the T<sub>3</sub> binding pocket. (B-C) The transcriptional activity of TR $\alpha$ 1 stimulated by 1 nM T<sub>3</sub>  
564 was significantly reduced by increasing concentrations of 4'-OH-PPF (B) and NH<sub>3</sub> (C) (EV:  
565 empty vector control). The data are presented as mean $\pm$ SEM of two independent experiments  
566 performed in triplicate (One-way ANOVA p<0.05; Tukey's post-test compared to 0 nM  
567 competitor, \*p<0.05, \*\*p<0.01, \*\*\*p<0.001). (D) [<sup>125</sup>I]T<sub>3</sub> dissociation curves showing the  
568 affinity of TR $\alpha$ 1 for 4'-OH-PPF and NH<sub>3</sub>. High concentrations of 4'-OH-PPF and NH<sub>3</sub> reduced  
569 TR-bound [<sup>125</sup>I]T<sub>3</sub>, indicating competitive binding to TR $\alpha$ 1. 10000 nM of 4'-OH-PPF and NH<sub>3</sub>  
570 corresponds to 3 mg/L and 4.7 mg/L respectively. The affinity of TR $\alpha$ 1 for 4'-OH-PPF was  
571 lower than for NH<sub>3</sub>, indicated by the right-shift of the curve and higher K<sub>d</sub> for 4'-OH-PPF. The  
572 data are presented as mean $\pm$ SEM of at least two independent experiments performed in duplicate.

573

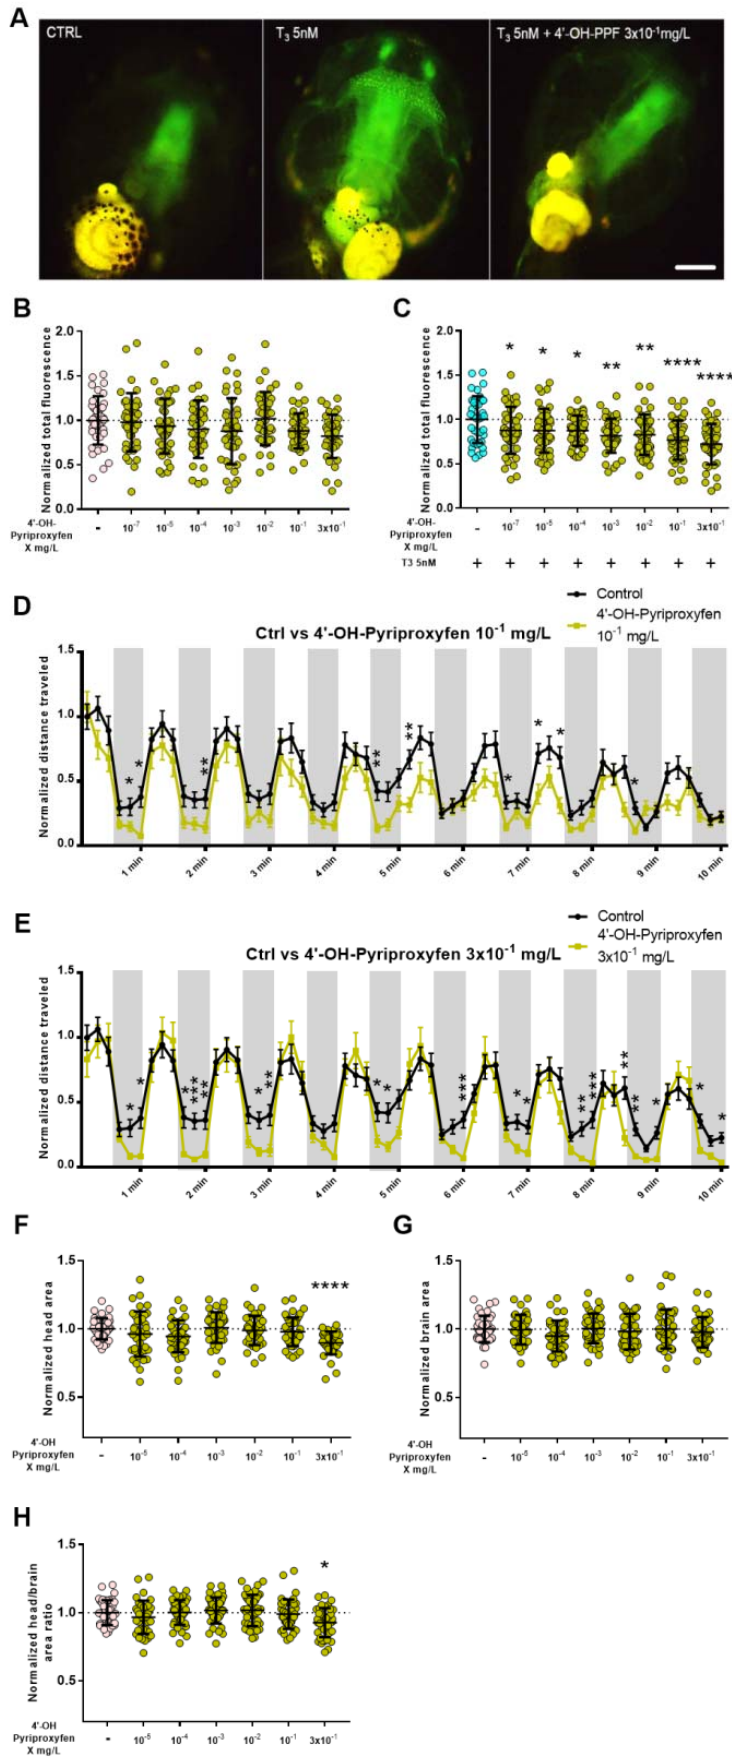

575 **Figure 2. 4'-OH-PPF affects thyroid hormone signalling and mobility of *Xenopus laevis***  
576 **tadpoles. (A)** Tg(*thibz*:GFP) tadpoles exposed for 72h to (from left to right) vehicle control, T<sub>3</sub>  
577 5nM and T<sub>3</sub> 5nM+ 4'-OH-PPF 3x10<sup>-1</sup>mg/L. Scale bar 500 μm. **(B-C)** 72 hours exposure of st 45  
578 Tg(*thibz*:GFP) *Xenopus laevis* tadpoles to 4'-OH- PPF in the absence **(B)** or presence of T<sub>3</sub> 5nM  
579 **(C)**. Values normalized to control group **(B)** or T<sub>3</sub> group **(C)**. Pool of 3 independent experiments;  
580 n=15 per experiment. One-way ANOVA with Dunn's post test (Mean ± SDs, \*P < 0.05, \*\*P <  
581 0.01, \*\*\*P < 0.001, \*\*\*\*P < 0.001). **(D-E)** Total distance travelled by tadpoles exposed to 4'-  
582 OH-PPF. 10 minute trial, distance traveled counted every 10 seconds. Dark background  
583 represents dark period, white background represents light period. Values normalized to first 10  
584 second period of control group. Pool of 3 independent experiments; n= 12 per experiment.  
585 Kruskal-Wallis (Mean ± SEM, \*P<0.05, \*\*P < 0.01, \*\*\*P < 0.001). **(F-H)** Area of the head **(F)**,  
586 brain **(G)** and head/brain ration **(H)** of st45 *Xenopus laevis* tadpole exposed to 4'-OH-PPF during  
587 72h. Values normalized to control group. Pool of 3 independent experiments; n=15 per  
588 experiment. One-way ANOVA with Dunn's post test (Mean ± SDs, \*P<0.05, \*\*\*\*P < 0.001).

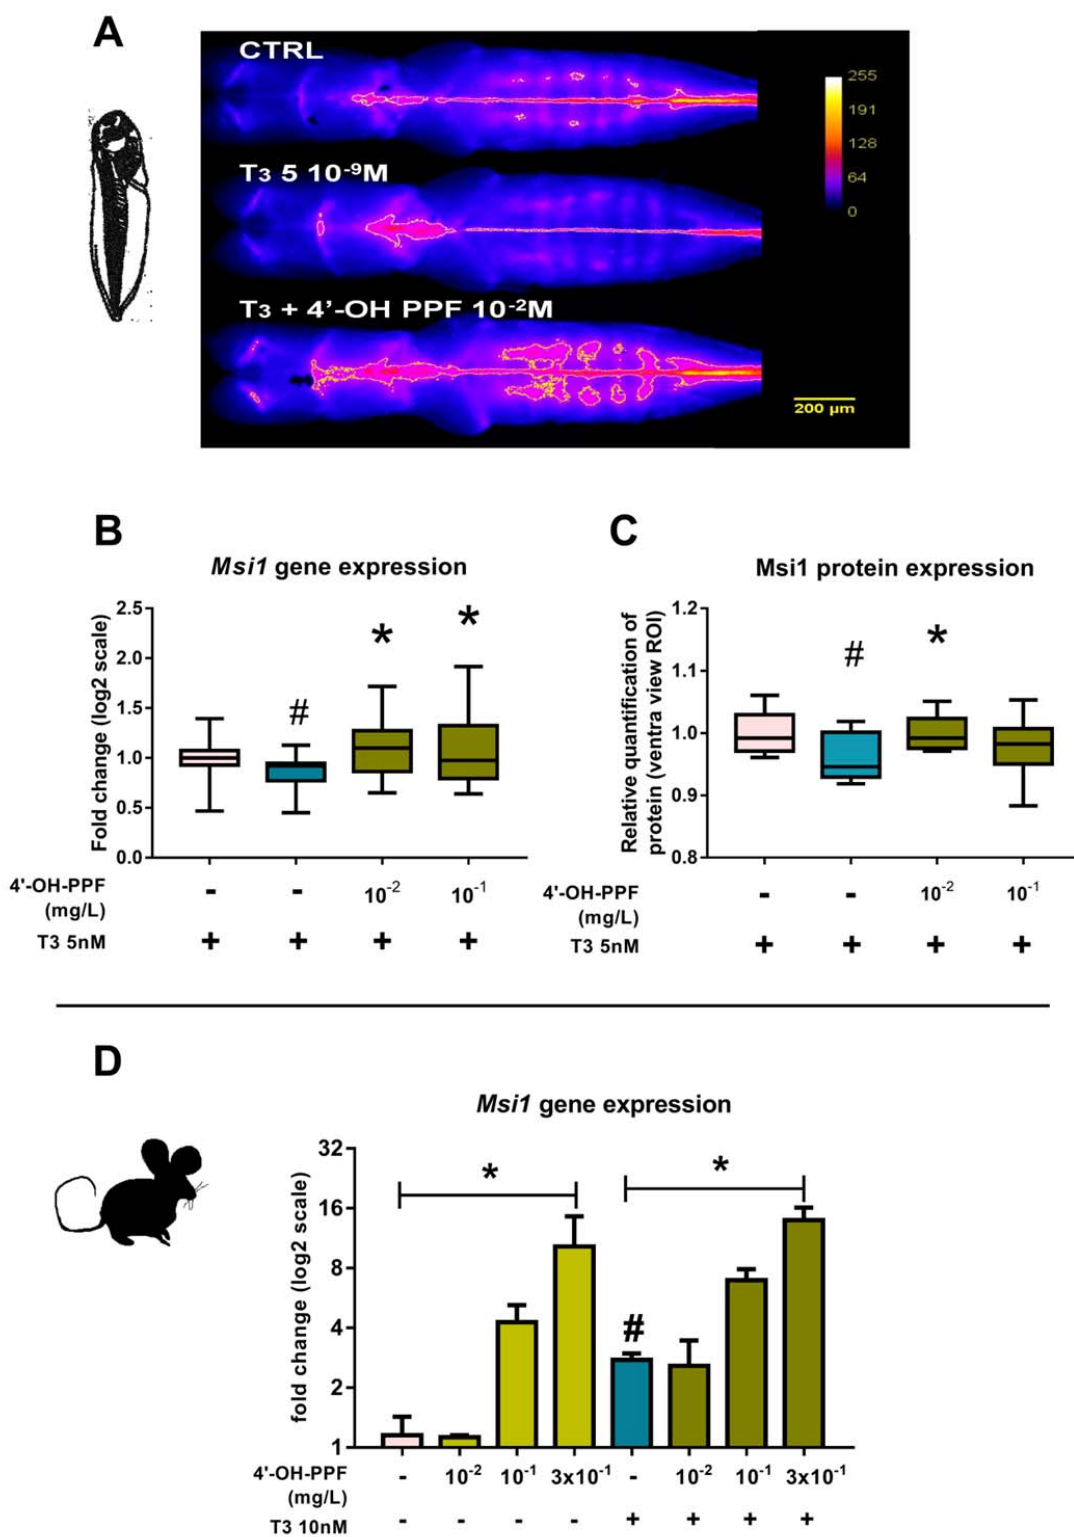

589

590

591

592

593 **Figure 3 : *Musashi1* gene expression and expression of its encoded protein is modified by**  
594 **TH and 4-OH-PPF. (A)** Representative pictures of immunohistochemistry realized on solvent  
595 control, T<sub>3</sub> 5nM and T<sub>3</sub>+ 4'-OH-PPF 10<sup>-2</sup> mg/L, ROI is delimited by thin white line. **(B)** *Msi1*  
596 gene expression on dissected brains from NF46 tadpoles exposed for 24h to 4'-OH-PPF (10<sup>-2</sup>; 10<sup>-1</sup>  
597 mg/L) in challenge with T<sub>3</sub> 5nM. **(C)** *Msi1* protein expression on dissected brains from NF46  
598 tadpoles exposed for 24h to 4'-OH-PPF (10<sup>-2</sup>; 10<sup>-1</sup> mg/L) in challenge with T<sub>3</sub> 5nM. Antibody  
599 Alexa Fluor 488-conjugated anti-rabbit. Quantification of the protein level based on fluorescence  
600 intensity from dorsal views. Two independent experiments in case of protein expression study  
601 with 4 to 10 tadpoles per experiment were done. Three independent experiments in the case of  
602 gene expression study, n=5 per experiment. **(D)** *Msi1* gene expression in mouse neurospheres  
603 after 7 days of proliferation. Graphs represent the pool of the experiments (each normalized to its  
604 own control). Non-parametric ANOVA ; Kruskal-Wallis with Dunnet's post test. \*p<0.05.  
605 Statistics comparing T<sub>3</sub> with control - Mann-Whitney; # p<0.05.

606
